# Supplementary material for: The Effect of Core Stabilization Training on Improving Gait and Self-Perceived Function in Patients with Knee Osteoarthritis: A Single-Arm Clinical Trial
Source: MDPI journal article supplement (doi:10.3390/pathophysiology29030040), 2022-09-01
Supplement: s1 [file s1]

## CORE STABILIZATION PROGRAM

| Week | Exercises                                                                                                                                                                                                                                                                                                                                                                                                                                                                                                                                                                                                                                                         | Progression/Intensity                                                                                                                                                                                                                                                                                                                                                                                               |
|------|-------------------------------------------------------------------------------------------------------------------------------------------------------------------------------------------------------------------------------------------------------------------------------------------------------------------------------------------------------------------------------------------------------------------------------------------------------------------------------------------------------------------------------------------------------------------------------------------------------------------------------------------------------------------|---------------------------------------------------------------------------------------------------------------------------------------------------------------------------------------------------------------------------------------------------------------------------------------------------------------------------------------------------------------------------------------------------------------------|
| 1    | <ol style="list-style-type: none"> <li>1. Transverse abdominis contraction education/performance  </li> <li>2. Supine bent knee fall outs*  </li> <li>3. Dead bug alternating leg lifts*  </li> <li>4. Quadruped alternating arm lifts*</li> <li>5. Quadruped alternating leg slides*</li> <li>6. Curl ups</li> <li>7. Bridge with alternating leg extension</li> </ol>                                                                                                                                                                                                                                                                                           | <ol style="list-style-type: none"> <li>1. Initiate in side-lying, progress to supine.</li> <li>2. NA</li> <li>3. Flexed knee moving leg → Sliding moving leg → straight leg raises on moving leg</li> <li>4. Add exercise 4 and 5 together as alternating arm and leg movements.</li> <li>5. See 4.</li> <li>6. NA</li> <li>7. Add transverse abdominis contraction to the exercise.</li> </ol>                     |
| 2    | <ol style="list-style-type: none"> <li>1. Transverse abdominis contractions  </li> <li>2. Dead bugs with one hip held by hand in 90 degrees of flexion, alternating leg lifts*  </li> <li>3. Quadruped hip extensions*  </li> <li>4. Quadruped alternating shoulder flexion/hip extension*</li> <li>5. Curl ups</li> <li>6. Bridge with alternating leg extension*</li> </ol>                                                                                                                                                                                                                                                                                     | <ol style="list-style-type: none"> <li>1. 3 sets x 10 reps</li> <li>2. Flexed knee moving leg → Sliding moving leg → straight leg raises on moving leg†</li> <li>3. Add ankle weights as able.</li> <li>4. Add ankle weights as able.</li> </ol>                                                                                                                                                                    |
| 3    | <ol style="list-style-type: none"> <li>1. Transverse abdominis contractions seated on BOSU ball  </li> <li>2. Seated on BOSU, alternating marching*  </li> <li>3. Dead bugs with one hip held by hand in 90 degrees of flexion, alternating leg lifts*  </li> <li>4. Dead bugs with one hip actively maintained in 90 degrees of flexion, alternating leg lifts* (as able, as a progression from exercise 3)</li> <li>5. Quadruped hip extensions with ankle weights*</li> <li>6. Quadruped alternating shoulder flexion/hip extension with ankle weights*</li> <li>7. Curl ups</li> <li>8. Bridge with alternating leg extension, with ankle weights*</li> </ol> | <ol style="list-style-type: none"> <li>1. 3 sets x 10 reps</li> <li>2. 3 sets x 10 reps</li> <li>3. Flexed knee moving leg → Sliding moving leg → straight leg raises on moving leg†</li> <li>4. Flexed knee moving leg → Sliding moving leg → straight leg raises on moving leg†</li> <li>5. 3 sets x 10 reps‡</li> <li>6. 3 sets x 10 reps‡</li> <li>7. 3 sets x 10 reps</li> <li>8. 3 sets x 10 reps‡</li> </ol> |

|   |                                                                                                                                                                                                                                                                                                                                                                                                                                                                                                                                                                        |                                                                                                                                                                                                                                                                                                                                                                                                                                                                                                                                                     |
|---|------------------------------------------------------------------------------------------------------------------------------------------------------------------------------------------------------------------------------------------------------------------------------------------------------------------------------------------------------------------------------------------------------------------------------------------------------------------------------------------------------------------------------------------------------------------------|-----------------------------------------------------------------------------------------------------------------------------------------------------------------------------------------------------------------------------------------------------------------------------------------------------------------------------------------------------------------------------------------------------------------------------------------------------------------------------------------------------------------------------------------------------|
| 4 | <ol style="list-style-type: none"> <li>1. Seated on BOSU, alternating marching*  </li> <li>2. Seated on BOSU, alternating knee extensions*  </li> <li>3. Dead bugs with one hip actively maintained in 90 degrees of flexion, alternating leg lifts*  </li> <li>4. Prone alternating hip extensions</li> <li>5. Seated on mat, bilateral symmetrical D2 flexion extension</li> <li>6. Modified prone, and bilateral lateral planks</li> <li>7. Curl ups</li> </ol>                                                                                                     | <ol style="list-style-type: none"> <li>1. 3 sets x 10 reps</li> <li>2. 3 sets x 10 reps</li> <li>3. Flexed knee moving leg → Sliding moving leg → straight leg raises on moving leg†</li> <li>4. 3 sets x 10 reps‡</li> <li>5. 3 sets x 10 reps, with resistance as able</li> <li>6. 2 sets to fatigue for all exercises, progress to 3 sets as tolerated at second visit</li> <li>7. 3 sets x 10 reps</li> </ol>                                                                                                                                   |
| 5 | <ol style="list-style-type: none"> <li>1. Seated on BOSU, alternating knee extensions*</li> <li>2. Seated on BOSU, alternating shoulder flexion and march on opposite arm/leg*  </li> <li>3. Seated on BOSU, bilateral symmetrical D2 flexion extension*  </li> <li>4. Dead bug with both hips moving simultaneously through movements*  </li> <li>5. Prone alternating hip extensions with ankle weights</li> <li>6. Prone bilateral, symmetrical hip extensions</li> <li>7. Prone baby-Supermans</li> <li>8. Modified prone, and bilateral lateral planks</li> </ol> | <ol style="list-style-type: none"> <li>1. 3 sets x 10 reps, with addition of ankle weights as tolerated</li> <li>2. 3 sets x 10 reps</li> <li>3. With resistance band as able.</li> <li>4. Flexed knee lifts → Sliding leg extensions → straight leg raises†</li> <li>5. 3 sets x 10 reps, increase weight as tolerated</li> <li>6. 3 sets x 10 reps, add weight as able</li> <li>7. 3 sets x 10 reps</li> <li>8. Progress away from modification as tolerated, or increase to three sets. At least 2 sets to fatigue in each direction.</li> </ol> |
| 6 | <ol style="list-style-type: none"> <li>1. Seated on BOSU, alternating shoulder flexion and march on opposite arm/leg*</li> <li>2. Seated on BOSU, bilateral asymmetrical D1/D2 flexion/extension*  </li> <li>3. Dead bug with both hips moving simultaneously through movements*  </li> <li>4. Prone bilateral, symmetrical hip extensions with ankle weights</li> <li>5. Prone baby-Supermans with hand weights (as tolerated)</li> <li>6. Prone Supermans  </li> <li>7. Modified or non-modified (as able) prone, and bilateral lateral planks</li> </ol>            | <ol style="list-style-type: none"> <li>1. 3 sets x 10 reps, with addition of ankle weights as tolerated</li> <li>2. 3 sets x 10 reps</li> <li>3. Flexed knee lifts → Sliding leg extensions → straight leg raises†</li> <li>4. 3 sets x 10 reps, increase resistance as able</li> <li>5. 3 sets x 10 reps, add resistance as able</li> <li>6. 3 sets x 10 reps</li> <li>7. 3 sets to fatigue in each direction.</li> </ol>                                                                                                                          |

\*These exercises will be performed while the patient maintains a transversus abdominis contraction.

†One set of each progression as able.

‡Increase weight on exercises as tolerated.

||Exercises to be performed independently, every other day three times weekly as a home exercise component for each week of the program. Exercises requiring equipment will be performed without in the home setting. Details provided in the Home Exercise Program Handout

**References:**

Kisner C, Thorp JN. The Spine: Exercise and Manipulation Interventions. In: Kisner C, Colby LA, eds. *Therapeutic Exercise: Foundations and Techniques*. 6<sup>th</sup> ed. Philadelphia, PA: F.A. Davis Company; 2012.

Granacher U, Lacroix A, Muehlbauer T, Roettger K, Gollhofer A. Effects of Core Instability Strength Training on Trunk Muscle Strength, Spinal Mobility, Dynamic Balance and Functional Mobility in Older Adults. *Gerontology*. 2013;59:105-113.
